# Supplementary material for: Anti-HBc IgG Responses Occurring at the Early Phase of Infection Correlate Negatively with HBV Replication in a Mouse Model
Source: MDPI journal article supplement (doi:10.3390/v14092011), 2022-09-11
Supplement: s1 [file s1]

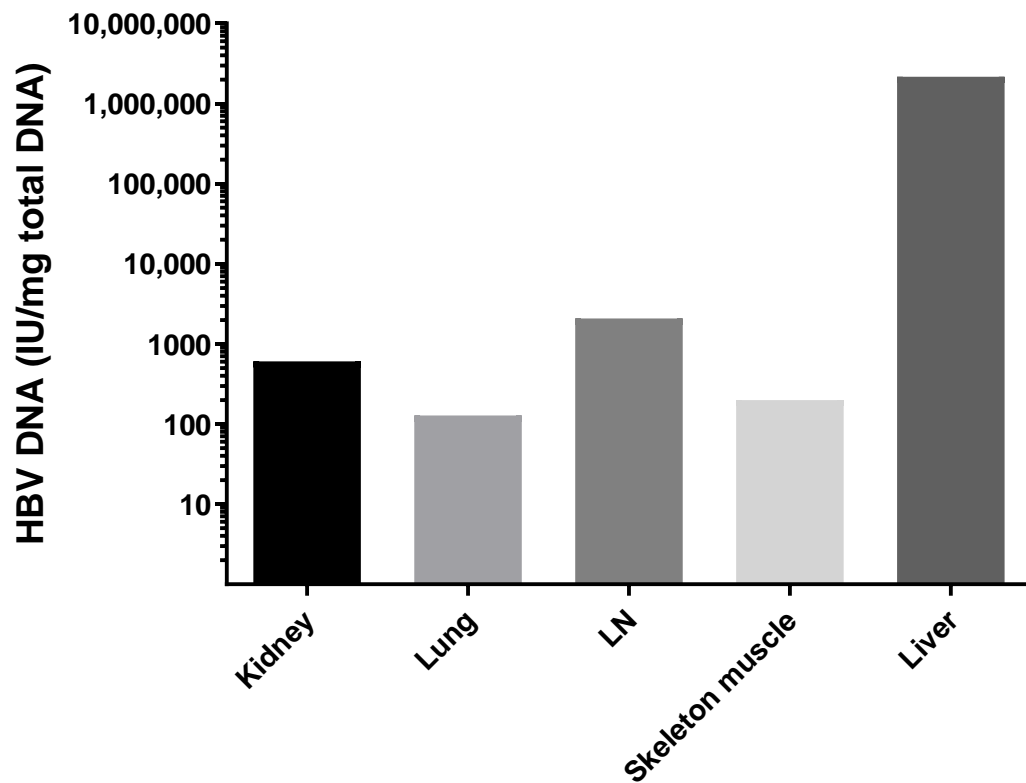

**Figure S1.** The distribution of HBV DNA in different tissues of an AAV8-1.3HBV infected mouse. A C57BL/6N mouse was infected with  $5 \times 10^{10}$  GC of AAV8-1.3HBV through tail vein injection and was euthanized at 1-week post infection. Tissue samples of kidney, lung, lymph node (LN), skeleton muscle and liver were collected. Total DNA was extracted using a Qiagen DNeasy Blood & Tissue Kit and HBV DNA was measured using a commercialized quantitative PCR kit.

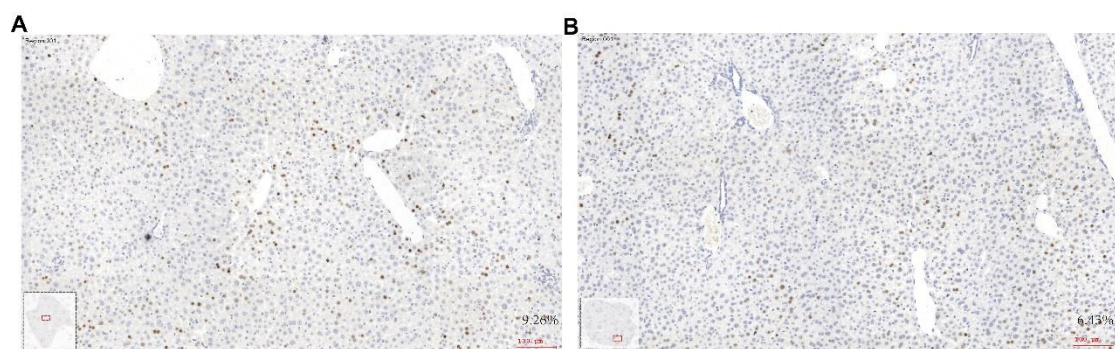

**Figure S2.** The detection of HBsAg<sup>+</sup> cells in livers of two AAV8-1.3HBV infected mice. Two C57BL/6N mice were euthanized at 6 weeks after AAV8-1.3HBV infection. HBsAg<sup>+</sup> cells were detected by an immunohistochemistry assay. (A) The frequency of HBsAg<sup>+</sup> cells in a mouse with relatively low early anti-HBc response (9.26%). (B) The frequency of HBsAg<sup>+</sup> cells in a mouse with relatively high early anti-HBc responses (6.43%).
